# Supplementary material
Source: PubMed Central journal article supplement (PMC4134750)
Supplement: NIHMS594524-supplement-Supp_MaterialS1.pdf [file NIHMS594524-supplement-Supp_MaterialS1.pdf]

**Data Supplement 1:** Multivariable linear regression models for length of stay

| Feature                                                                   | Estimate (SE) | P-value |
|---------------------------------------------------------------------------|---------------|---------|
| Total LOS*                                                                |               |         |
| Period (intervention vs. control)                                         | 0.19 (0.25)   | 0.46    |
| Daily census                                                              | 0.20 (0.08)†  | 0.009   |
| ESI level (4/5 vs. 3)                                                     | -2.79 (0.27)  | <0.001  |
| Treatment Room LOS*                                                       |               |         |
| Period (intervention vs. control)                                         | -1.32 (0.27)  | <0.001  |
| Daily census                                                              | 0.00 (0.08)†  | 0.96    |
| ESI level (4/5 vs. 3)                                                     | -4.53 (0.28)  | <0.001  |
| Waiting Room LOS*                                                         |               |         |
| Period (intervention vs. control)                                         | 1.45 (0.29)   | <0.001  |
| Daily census                                                              | 0.30 (0.09)†  | 0.001   |
| ESI level (4/5 vs. 3)                                                     | 1.27 (0.30)   | <0.001  |
| * LOS transformed using the square root.                                  |               |         |
| † Estimate and SE represent a 10-unit increase.                           |               |         |
| SE = standard error; ESI = Emergency Severity Index; LOS = length of stay |               |         |
