# Supplementary material
Source: PubMed Central journal article supplement (PMC4134750)
Supplement: NIHMS594524-supplement-Supp_MaterialS2.pdf [file NIHMS594524-supplement-Supp_MaterialS2.pdf]

**Data Supplement 2: Multivariable Logistic Regression Model for Left Without Being Seen**

| Feature                                                                                          | OR (95% CI)       | P-value |
|--------------------------------------------------------------------------------------------------|-------------------|---------|
| Period (intervention vs control)                                                                 | 0.91 (0.57-1.45)  | 0.68    |
| Daily census                                                                                     | 1.06 (0.92-1.22)* | 0.42    |
| ESI level (4/5 vs. 3)                                                                            | 2.38 (1.52-3.73)  | <0.001  |
| * OR and 95% CI represent a 10-unit increase.<br>OR = odds ratio; ESI = Emergency Severity Index |                   |         |
